# Supplementary material for: Meditative movement for breathlessness in advanced COPD or cancer: a systematic review and meta-analysis
Source: PubMed Central journal article supplement — Eur Respir Rev. 2023 Jun 21;32(168):220243. doi: 10.1183/16000617.0243-2022 (PMC10282812; doi:10.1183/16000617.0243-2022), 2023-06-21
Supplement: ERR-0243-2022.SUPPLEMENT.pdf [file ERR-0243-2022.SUPPLEMENT.pdf]

# The effect of meditative movement on breathlessness in people with advanced disease: a systematic review and meta-analysis

## Online supplement

### Methods: Search strategy

#### CENTRAL and CDSR

- #1 MeSH descriptor: [Yoga] explode all trees
- #2 (yoga\* or yogic\*):ti,ab,kw (Word variations have been searched)
- #3 MeSH descriptor: [Tai ji] explode all trees
- #4 (tai chi\* or taichi\* or tai ji\* or taiji\*):ti,ab,kw (Word variations have been searched)
- #5 MeSH descriptor: [Qigong] explode all trees
- #6 (qi gong\* or qi gong\* or chi kung\* or chi gung\*):ti,ab,kw (Word variations have been searched)
- #67(#1 or #2 or #3 or #4 or #5 or #6)
- #8 (advance\* near/6 (disease\* or illness\*)):ti,ab,kw (Word variations have been searched)
- #9 MeSH descriptor: [Neoplasms] explode all trees
- #10 (cancer\* or neoplas\* or malignan\* or carcinoma\* or tumor\* or tumour\* or metasta\* or adenocarcinoma\* or lymphoma\* or leukemia\* or leukaemia\*):ti,ab,kw (Word variations have been searched)
- #11 MeSH descriptor: [Pulmonary Disease, Chronic Obstructive] explode all trees
- #12 (chronic and obstruct\* and (pulmonary or airway\* or airflow or lung\*)):ti,ab,kw (Word variations have been searched)
- #13 COPD:ti,ab,kw (Word variations have been searched)
- #14 ((pulmonary or respiratory) near/6 disease\*):ti,ab,kw (Word variations have been searched)
- #15 MeSH descriptor: [Heart Diseases] explode all trees
- #16 (((cardi\* or heart) near/6 (disease\* or failure)) or CHF):ti,ab,kw (Word variations have been searched)
- #17 (#8 or #9 or #10 or #11 or #12 or #13 or #14 or #15 or #16)
- #18 (#7 and #17)

## **MEDLINE (OVID)**

1 exp Yoga/

2 (yoga\* or yogic\*).ti,ab.

3 exp Tai Ji/

4 (tai chi\* or taichi\* or tai ji\* or taiji\*).ti,ab.

5 exp Qigong/

6 (qi gong\* or qi gong\* or chi kung\* or chi gung\*).ti,ab.

7 1 or 2 or 3 or 4 or 5 or 6

8 (advance\* adj6 (disease\* or illness\*)).ti,ab.

9 exp neoplasms/

10 (cancer\* or neoplas\* or malignan\* or carcinoma\* or tumor\* or tumour\* or metasta\* or adenocarcinoma\* or lymphoma\* or leukemia\* or leukaemia\*).ti,ab.

11 exp Pulmonary Disease, Chronic Obstructive/

12 (chronic and obstruct\* and (pulmonary or airway\* or airflow or lung\*)).ti,ab.

13 COPD.ti,ab.

14 ((pulmonary or respiratory) adj6 disease\*).ti,ab.

15 exp heart diseases/

16 (((cardi\* or heart) adj6 (disease\* or failure)) or CHF).ti,ab.

17 8 or 9 or 10 or 11 or 12 or 13 or 14 or 15 or 16

18 7 and 17

## Embase (OVID)

1 yoga/

2 (yoga\* or yogic\*).ti,ab.

3 Tai Chi/

4 (tai chi\* or taichi\* or tai ji\* or taiji\*).ti,ab.

5 qigong/

6 (qi gong\* or qi gong\* or chi kung\* or chi gung\*).ti,ab.

7 or/1-6

8 (advance\* adj6 (disease\* or illness\*)).ti,ab.

9 exp neoplasm/

10 (cancer\* or neoplas\* or malignan\* or carcinoma\* or tumor\* or tumour\* or metasta\* or adenocarcinoma\* or lymphoma\* or leukemia\* or leukaemia\*).ti,ab.

11 chronic obstructive lung disease/

12 (chronic and obstruct\* and (pulmonary or airway\* or airflow or lung\*)).ti,ab.

13 COPD.mp.

14 ((pulmonary or respiratory) adj6 disease\*).ti,ab.

15 exp heart disease/

16 (((cardi\* or heart) adj6 (disease\* or failure)) or CHF).ti,ab.

17 8 or 9 or 10 or 11 or 12 or 13 or 14 or 15 or 16

18 7 and 17

19 random\$.tw.

20 factorial\$.tw.

21 crossover\$.tw.

22 cross over\$.tw.

23 placebo\$.tw.

24 (doubl\$ adj blind\$).tw.

25 (singl\$ adj blind\$).tw.

26 assign\$.tw.

27 allocat\$.tw.

28 volunteer\$.tw.

29 Crossover Procedure/

30 double blind procedure.tw.

31 Randomized Controlled Trial/

32 Single Blind Procedure/

33 19 or 20 or 21 or 22 or 23 or 24 or 25 or 26 or 27 or 28 or 29 or 30 or 31 or 32

34 (animal/ or nonhuman/) not human/

35 33 not 34

36 18 and 35

## PsycINFO (OVID)

1 yoga.ti,ab.

2 (yoga\* or yogic\*).ti,ab.

3 tai chi.ti,ab.

4 (tai chi\* or taichi\* or tai ji\* or taiji\*).ti,ab.

5 qi gong.ti,ab.

6 (qi gong\* or qi gong\* or chi kung\* or chi gung\*).ti,ab.

7 (advance\* adj6 (disease\* or illness\*)). ti,ab.

8 exp neoplasm/

9 (cancer\* or neoplas\* or malignan\* or carcinoma\* or tumor\* or tumour\* or metasta\* or adenocarcinoma\* or lymphoma\* or leukemia\* or leukaemia\*).ti,ab.

10 chronic obstructive pulmonary disease/

11 (chronic and obstruct\* and (pulmonary or airway\* or airflow or lung\*)).ti,ab.

12 COPD.ti,ab.

13 ((pulmonary or respiratory) adj6 disease\*).ti,ab.

14 exp heart disorders/

15 (((cardi\* or heart) adj6 (disease\* or failure)) or CHF).ti,ab.

16 7 or 8 or 9 or 10 or 11 or 12 or 13 or 14 or 15

17 1 or 2 or 3 or 4 or 5 or 6

18 16 and 17

**CINAHL (EBSCO)**

S18 S7 AND S17

S17 S8 OR S9 OR S10 OR S11 OR S12 OR S13 OR S14 OR S15 OR S16

S16 (((cardi\* or heart) N6 (disease\* or failure)) or CHF)

S15 (MH "Heart Diseases+")

S14 ((pulmonary or respiratory) N6 disease\*)

S13 COPD

S12 (chronic and obstruct\* and (pulmonary or airway\* or airflow or lung\*))

S11 (MH "Pulmonary Disease, Chronic Obstructive+")

S10 (cancer\* or neoplas\* or malignan\* or carcinoma\* or tumor\* or tumour\* or metasta\* or adenocarcinoma\* or lymphoma\* or leukemia\* or leukaemia\*)

S9 (MH "Neoplasms+")

S8 (advance\* N6 (disease\* or illness\*))

S7 S1 OR S2 OR S3 or S4 OR S5 OR S6

S6 TI (qi gong\* or qi gong\* or chi kung\* or chi gung\*) OR AB (qi gong\* or qi gong\* or chi kung\* or chi gung\*)

S5 (MH "Qigong+")

S4 TI (tai chi\* or taichi\* or tai ji\* or taiji\*) or AB (tai chi\* or taichi\* or tai ji\* or taiji\*)

S3 (MH "Tai Chi+")

S2 TI (yoga\* or yogic\*) or AB (yoga\* or yogic\*)

S1 (MH "Yoga+")

## Wanfang database

- 1 主题:(气功 OR 十二段锦 OR 八段锦 OR 五禽戏 OR 易筋经 OR 六字诀 OR 太极养生杖 OR 大舞 OR 导引十二法 OR 马王堆导引术)
- 2 主题:(太极 OR 太极拳 OR 太极内功)
- 3 主题:(瑜伽)
- 4 主题:(疾病晚期 OR 晚期疾病 OR 严重疾病)
- 5 主题:(癌症 OR 癌症转移 OR 恶性肿瘤 OR 白血病 OR 淋巴瘤 OR 腺瘤 OR 癌)
- 6 主题:(慢阻肺 OR 慢性阻塞性肺疾病 OR 气流阻塞 OR 慢性支气管炎 OR 阻塞性肺气肿 OR 呼吸衰竭 OR 呼衰 OR 慢性肺部疾病 OR 慢性呼吸道疾病 OR 肺功能障碍)
- 7 主题:(心力衰竭 OR 心衰 OR 心衰竭 OR 心功能障碍 OR 心肌功能障碍 OR 心脏疾病 OR 心脏病)
- 8 主题:(随机对照试验 OR 干预研究 OR 临床试验)
- 9 1 OR 2 OR 3
- 10 4 OR 5 OR 6 OR 7
- 11 8 AND 9 AND 10

主题:(疾病晚期 OR 晚期疾病 OR 严重疾病) or 主题:(癌症 OR 癌症转移 OR 恶性肿瘤 OR 白血病 OR 淋巴瘤 OR 腺瘤 OR 癌) or 主题:(慢阻肺 OR 慢性阻塞性肺疾病 OR 气流阻塞 OR 慢性支气管炎 OR 阻塞性肺气肿 OR 呼吸衰竭 OR 呼衰 OR 慢性肺部疾病 OR 慢性呼吸道疾病 OR 肺功能障碍) or 主题:(心力衰竭 OR 心衰 OR 心衰竭 OR 心功能障碍 OR 心肌功能障碍 OR 心脏疾病 OR 心脏病) and 主题:(气功 OR 十二段锦 OR 八段锦 OR 五禽戏 OR 易筋经 OR 六字诀 OR 太极养生杖 OR 大舞 OR 导引十二法 OR 马王堆导引术) or 主题:(太极 OR 太极拳 OR 太极内功) or 主题:(瑜伽) and 主题:(随机对照试验 OR 干预研究 OR 临床试验)

Using **advanced search** method, and search category '**subject**' and document type '**journals, dissertation**' with no date limit, and **synonym extension function**

## Chinese National Knowledge Infrastructure (CKNI)

(SU = (气功 OR 十二段锦 OR 八段锦 OR 五禽戏 OR 易筋经 OR 六字诀 OR 太极养生杖 OR 大舞 OR 导引十二法 OR 马王堆导引术) or SU = (太极 OR 太极拳 OR 太极内功) or SU = (瑜伽)) AND (SU = (疾病晚期 OR 晚期疾病 OR 严重疾病) or SU = (癌症 OR 癌症转移 OR 恶性肿瘤 OR 白血病 OR 淋巴瘤 OR 腺瘤 OR 癌) or SU = (慢阻肺 OR 慢性阻塞性肺疾病 OR 气流阻塞 OR 慢性支气管炎 OR 阻塞性肺气肿 OR 呼吸衰竭 OR 呼衰 OR 慢性肺部疾病 OR 慢性呼吸道疾病 OR 肺功能障碍) or SU = (心力衰竭 OR 心衰 OR 心衰竭 OR 心功能障碍 OR 心肌功能障碍 OR 心脏疾病 OR 心脏病))

Using **professional search** method, and search category '**subject**' and document type '**research article**' with no date limit, and **synonym extension function**



## Sinomed

1 (("气功"[常用字段:智能] OR "十二段锦"[常用字段:智能] OR "八段锦"[常用字段:智能] OR "五禽戏"[常用字段:智能] OR "易筋经"[常用字段:智能] OR "六字诀"[常用字段:智能] OR "太极养生杖"[常用字段:智能] OR "大舞"[常用字段:智能] OR "导引十二法"[常用字段:智能] OR "马王堆导引术"[常用字段:智能]) OR ("太极"[常用字段:智能] OR "太极拳"[常用字段:智能] OR "太极内功"[常用字段:智能]) OR "瑜伽"[常用字段:智能]) AND ( 临床试验[文献类型] OR 随机对照试验[文献类型])

2 ("疾病晚期"[常用字段:智能] OR ("癌症"[常用字段:智能] OR "恶性肿瘤"[常用字段:智能] OR "白血病"[常用字段:智能] OR "淋巴瘤"[常用字段:智能] OR "癌"[常用字段:智能]) OR ("慢阻肺"[常用字段:智能] OR "慢性阻塞性肺疾病"[常用字段:智能] OR "呼吸衰竭"[常用字段:智能] OR "呼衰"[常用字段:智能] OR "肺功能障碍"[常用字段:智能])) AND ( 临床试验[文献类型] OR 随机对照试验[文献类型]) AND ( 人类[特征词])

3 (((#1 AND #2) AND (临床试验[文献类型] OR 随机对照试验[文献类型]) AND 人类[特征词])

Using **advanced searching** method, and search category '**常用字段**' and document type '**clinical trails, randomised control trails**' and journal type '**Chinese Medical Association accredited journals**' with no date limit.

## Results

### *Risk of bias*

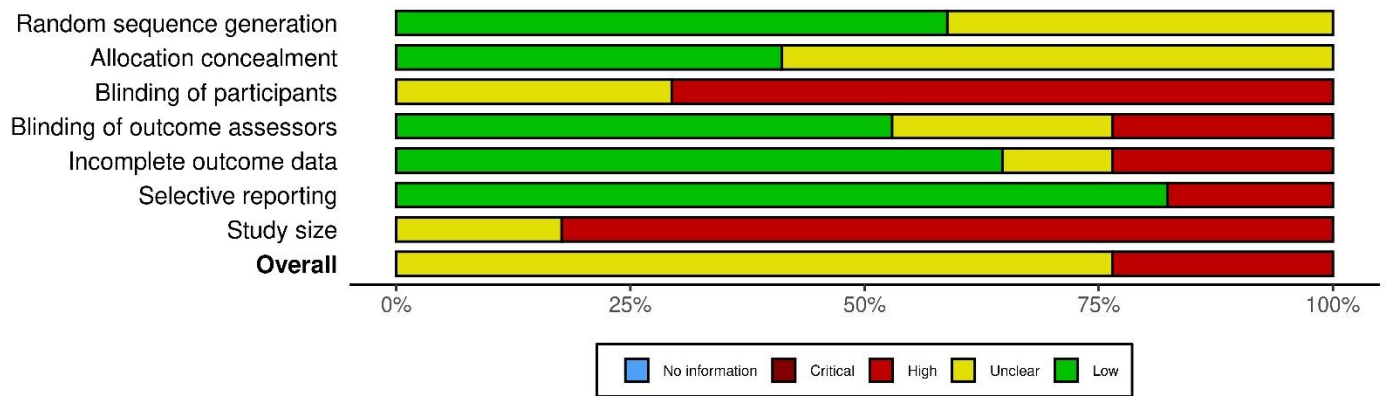

Figure S1. Risk of bias' graph: review authors' judgements about each risk of bias item presented as percentages across all included studies.

|                  |                           | Risk of bias |    |    |    |    |    |    |         |
|------------------|---------------------------|--------------|----|----|----|----|----|----|---------|
|                  |                           | D1           | D2 | D3 | D4 | D5 | D6 | D7 | Overall |
| Study            | Yeh et al 2010            | +            | +  | X  | +  | +  | X  | X  | X       |
|                  | Yuexia Wang et al 2014    | -            | -  | -  | -  | +  | +  | X  | -       |
|                  | Polkey et al 2018         | -            | -  | X  | X  | +  | +  | -  | -       |
|                  | Zhu et al 2018            | +            | -  | X  | X  | +  | +  | X  | -       |
|                  | Moy et al 2021            | +            | +  | X  | +  | +  | +  | X  | X       |
|                  | Cheung et al 2021         | +            | +  | X  | +  | X  | +  | X  | -       |
|                  | Donesky Cuenco et al 2009 | -            | -  | X  | X  | X  | +  | X  | -       |
|                  | Kaminsky et al 2017       | +            | -  | -  | +  | +  | +  | X  | -       |
|                  | Vadiraja et al 2009       | +            | -  | X  | X  | -  | +  | X  | -       |
|                  | Dongxin Zhao et al 2011   | -            | -  | -  | -  | +  | +  | X  | X       |
|                  | Ng et al 2011             | +            | +  | X  | +  | X  | +  | X  | -       |
|                  | Xiao et al 2015           | -            | -  | X  | +  | +  | +  | -  | X       |
|                  | Siqin Ji et al 2019       | -            | -  | -  | -  | +  | X  | X  | -       |
|                  | Yanchan Zhen et al 2019   | -            | -  | -  | -  | +  | X  | X  | -       |
|                  | Vanderbyl et al 2017      | +            | +  | X  | +  | X  | +  | X  | -       |
|                  | Molassiotis et al 2021    | +            | +  | X  | +  | -  | +  | -  | -       |
| Malik et al 2022 | +                         | +            | X  | +  | +  | +  | X  | -  |         |

D1: Random sequence generation  
 D2: Allocation concealment  
 D3: Blinding of participants  
 D4: Blinding of outcome assessors  
 D5: Incomplete outcome data  
 D6: Selective reporting  
 D7: Study size

Judgement  
 X High  
 - Unclear  
 + Low

Figure S2. 'Risk of bias' summary: review authors' judgements about each risk of bias item for each included study

**Primary outcome: Breathlessness**

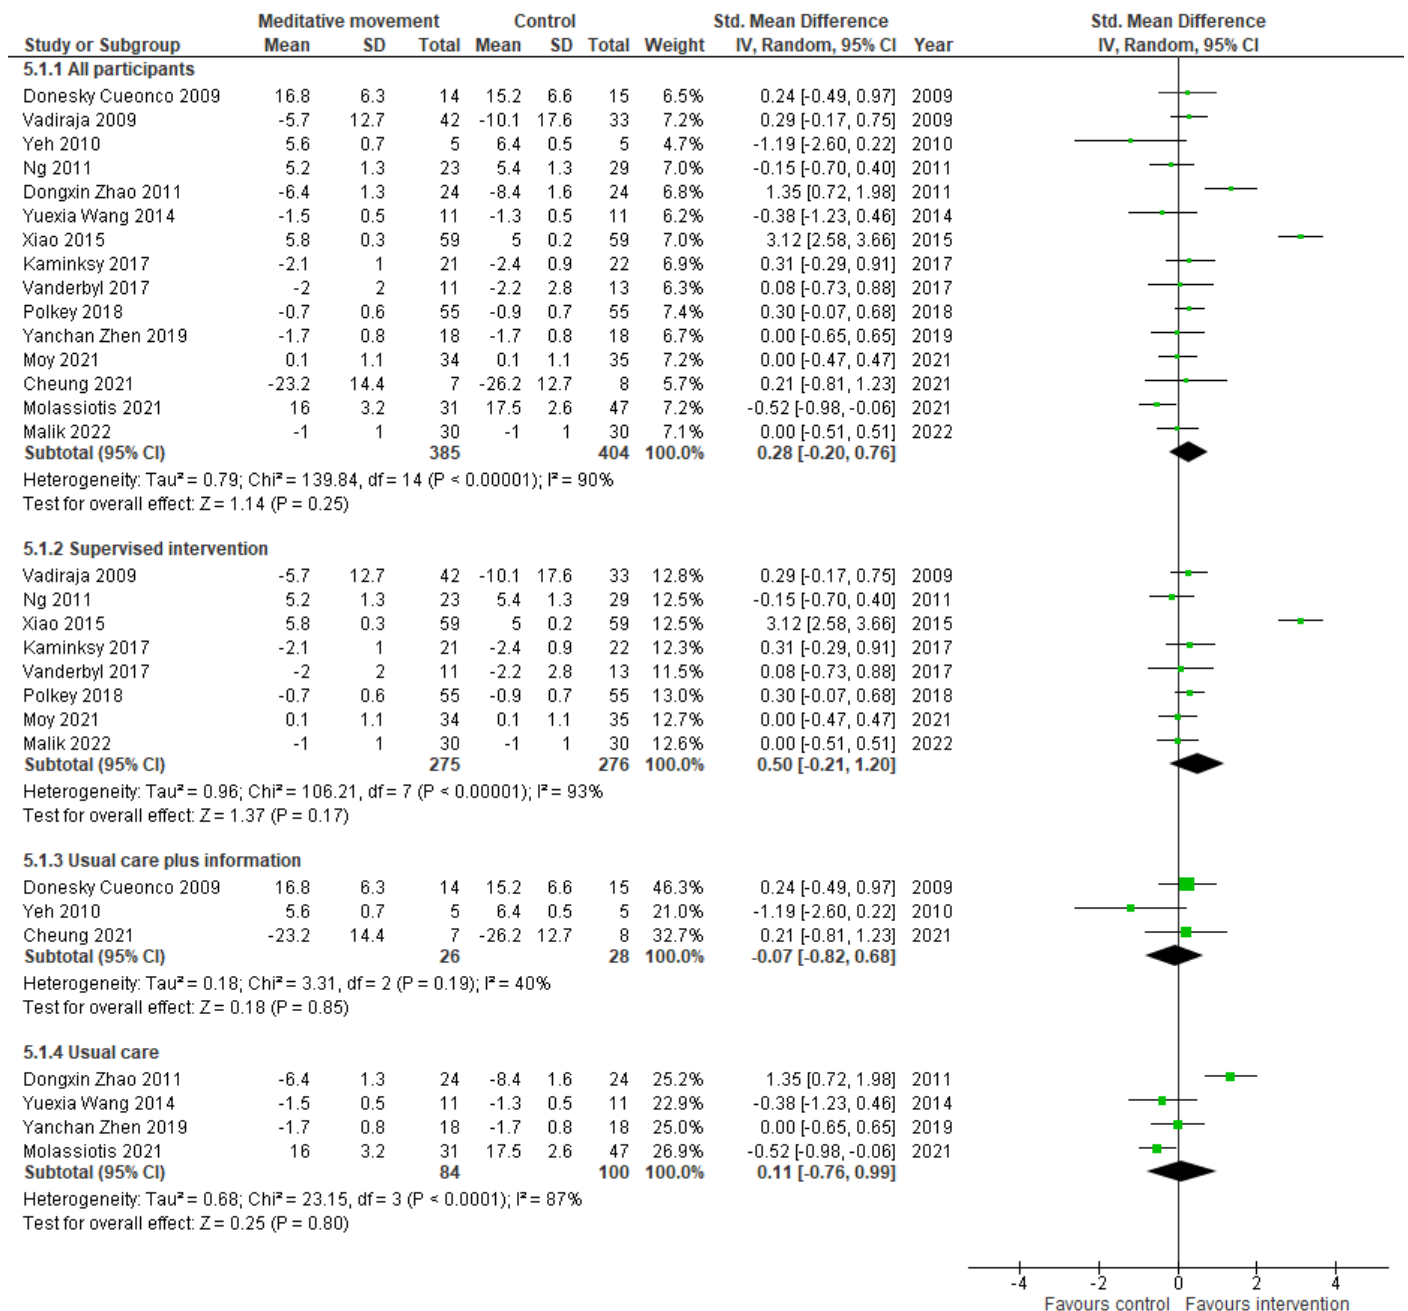

Figure S3. Forest plot comparing meditative movement and control intervention for the primary outcome – breathlessness – for all participants and comparators categorised as supervised intervention, usual care plus information and usual care including the study with outlier data (1).

Abbreviations: CI: Confidence Interval; SD: Standard Deviation.

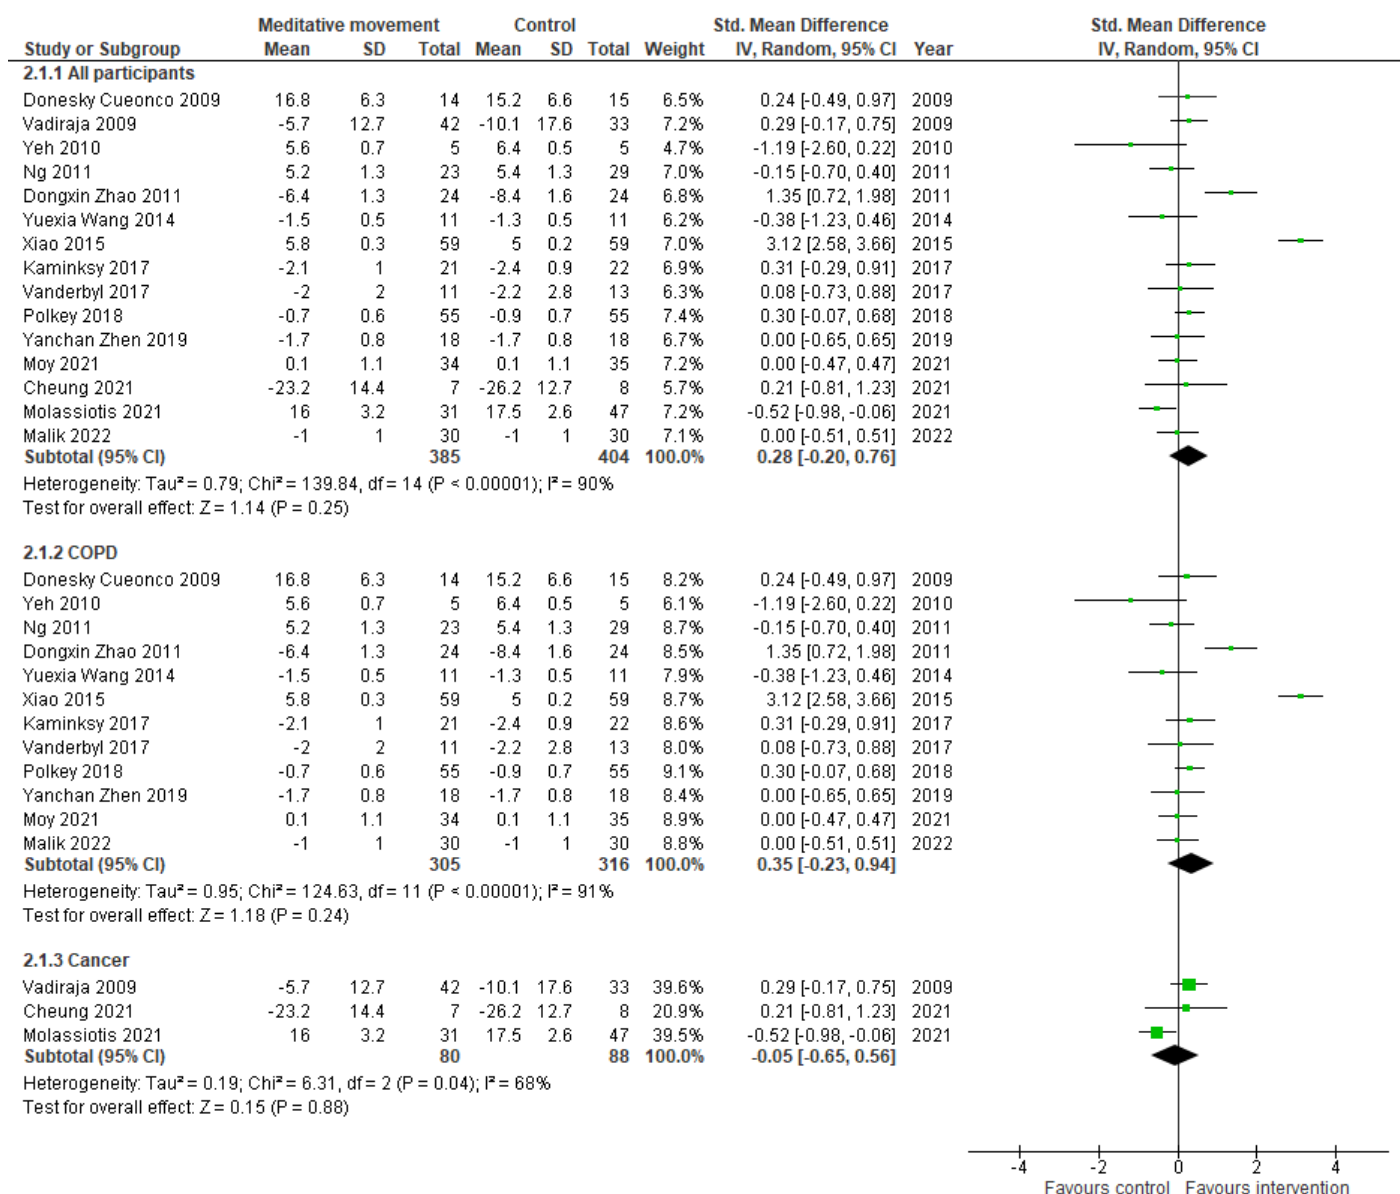

Figure S4. Forest plot comparing meditative movement and control intervention for the primary outcome – breathlessness – for all participants, people with COPD and people with cancer including the study with outlier data (1).

Abbreviations: CI: Confidence Interval; COPD: Chronic Obstructive Pulmonary Disease; SD: Standard Deviation.

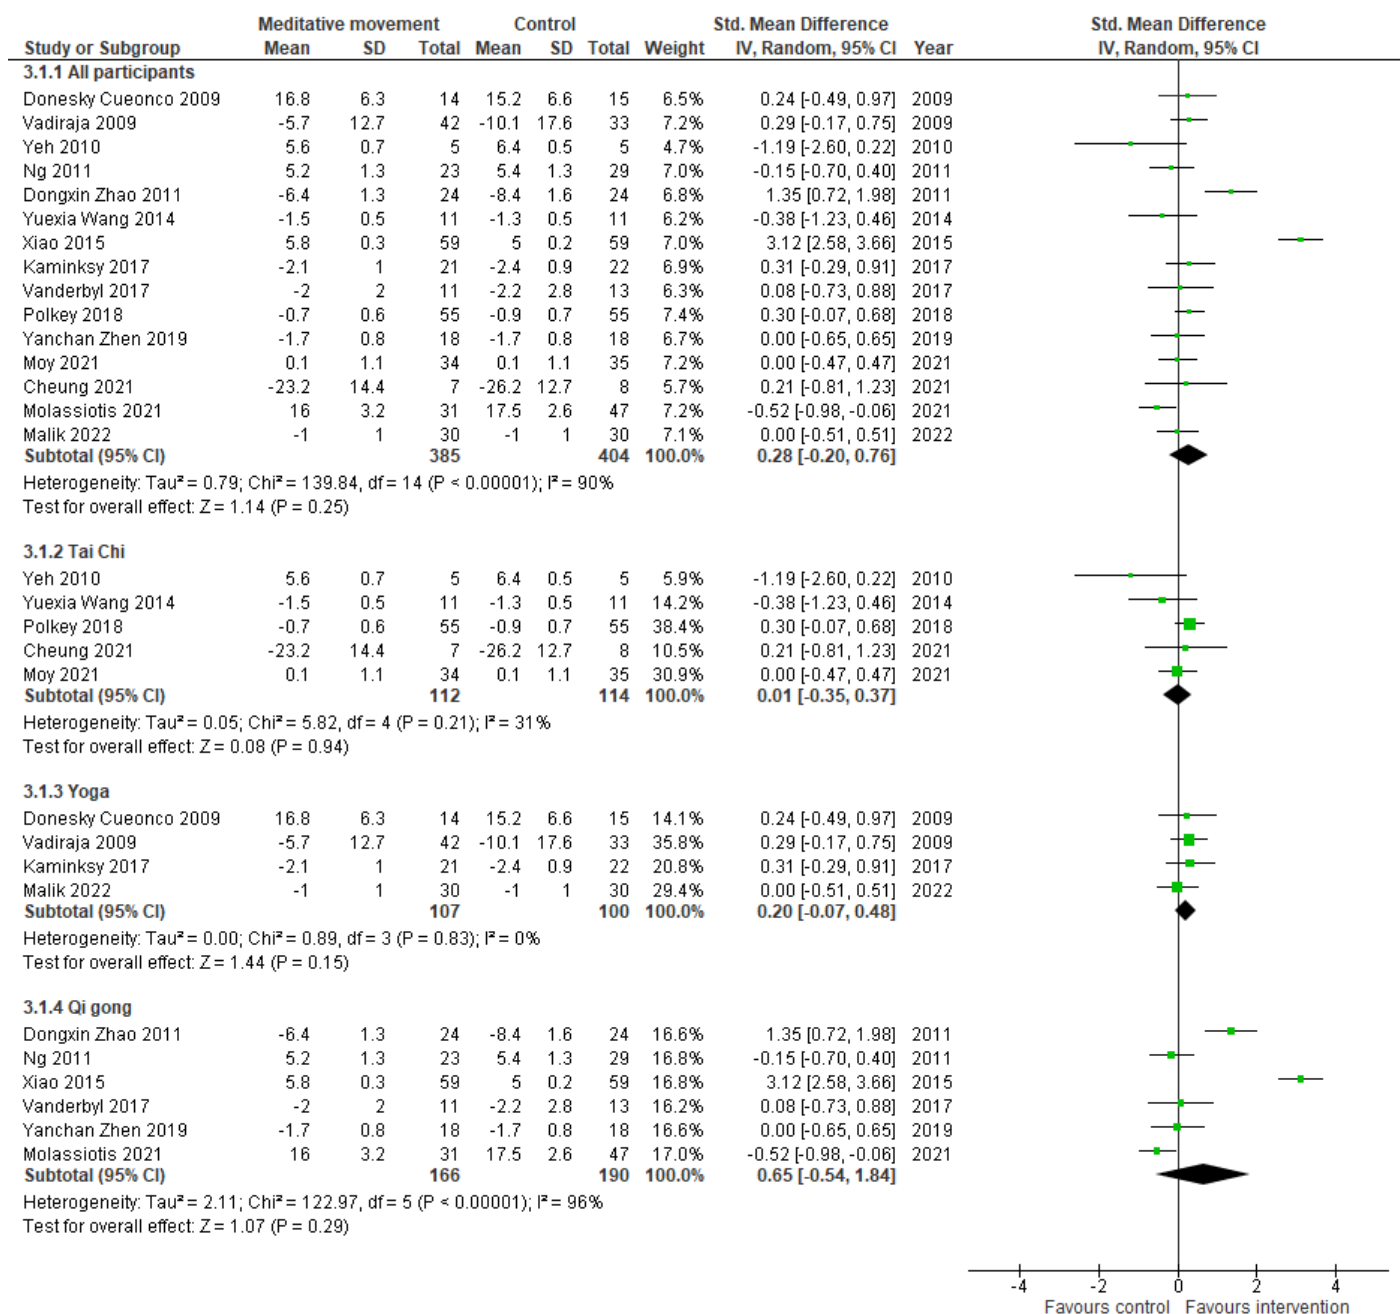

Figure S5. Forest plot comparing meditative movement and control intervention for the primary outcome – breathlessness – for all participants and according to intervention type (Tai Chi, yoga, Qi gong) (including the study with outlier data) (1).

Abbreviations: CI: Confidence Interval; SD: Standard Deviation

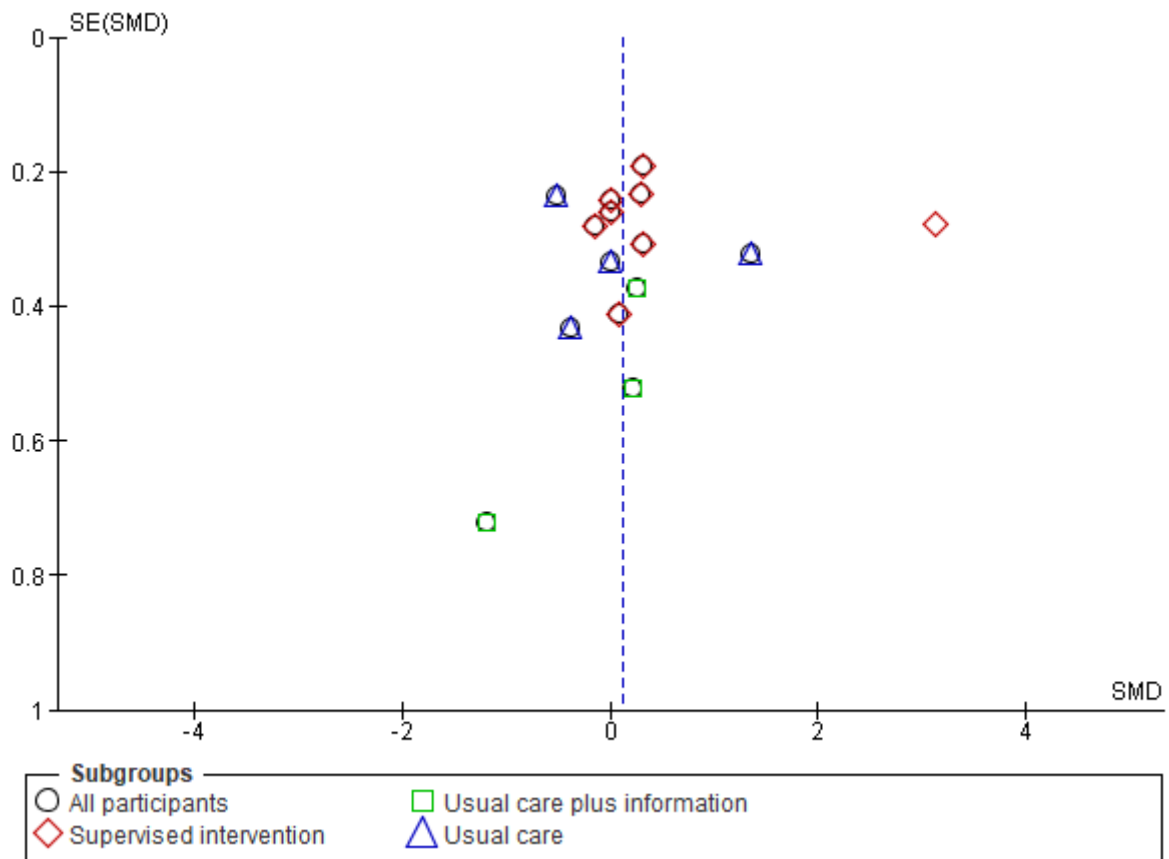

Figure S6. Funnel plot comparing meditative movement and control intervention for the primary outcome – breathlessness – for all participants and comparators categorised as supervised intervention, usual care plus information and usual care (excluding the study with outlier data).

*Abbreviations: SMD: Standardised Mean Difference.*

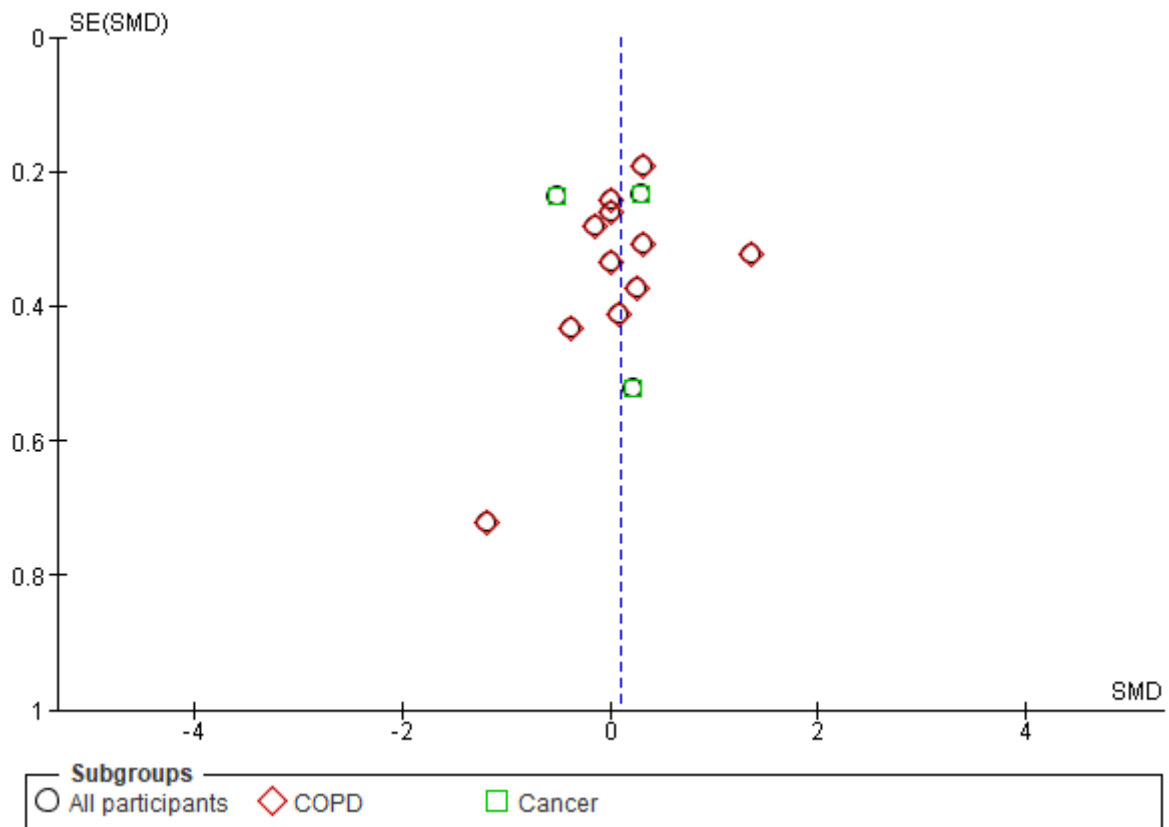

Figure S7. Funnel plot comparing meditative movement and control intervention for the primary outcome – breathlessness – for all participants, people with COPD and people with cancer (excluding the study with outlier data).

Abbreviations: COPD: Chronic Obstructive Pulmonary Disease; SMD: Standardised Mean Difference.



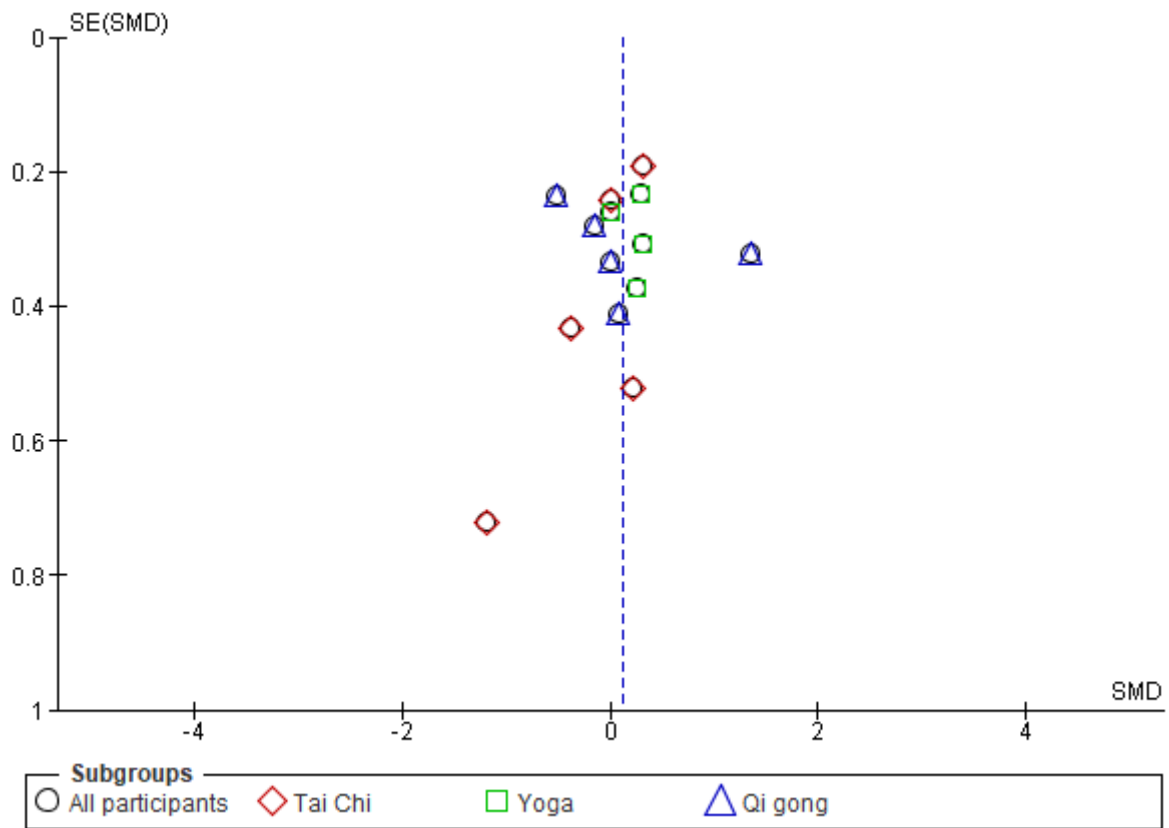

Figure S8. Funnel plot comparing meditative movement and control intervention for the primary outcome – breathlessness – for all participants and according to intervention type (Tai Chi, yoga, Qi gong) (excluding the study with outlier data).

Abbreviations: SMD: Standardised Mean Difference.

**Secondary outcome: Health-related quality of life**

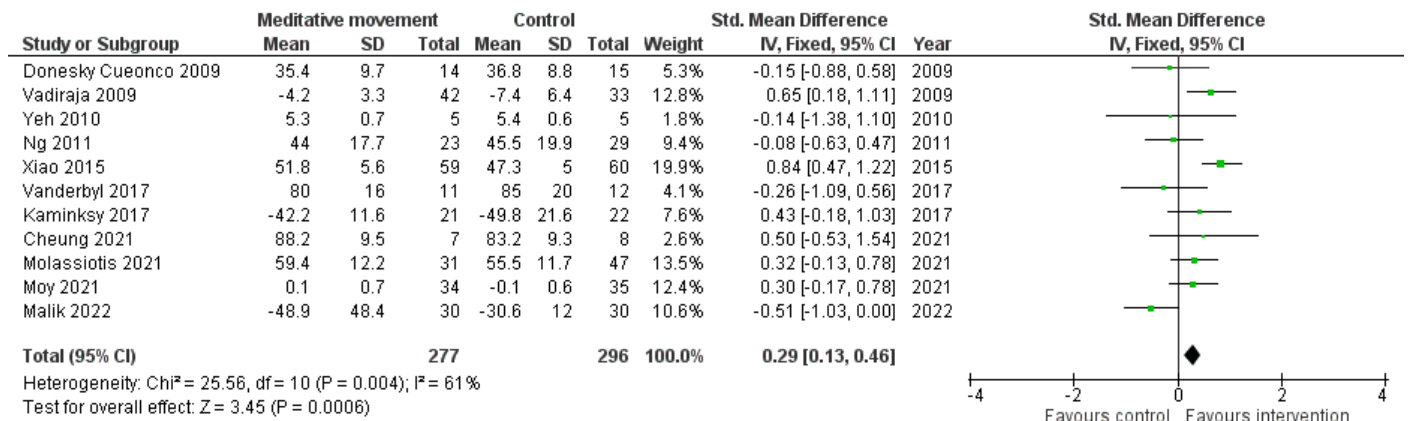

Figure S9. Forest plot comparing meditative movement and control intervention for health-related quality of life including the study with outlier data (Xiao and colleagues) (1).

Abbreviations: CI: Confidence Interval; SD: Standard Deviation.

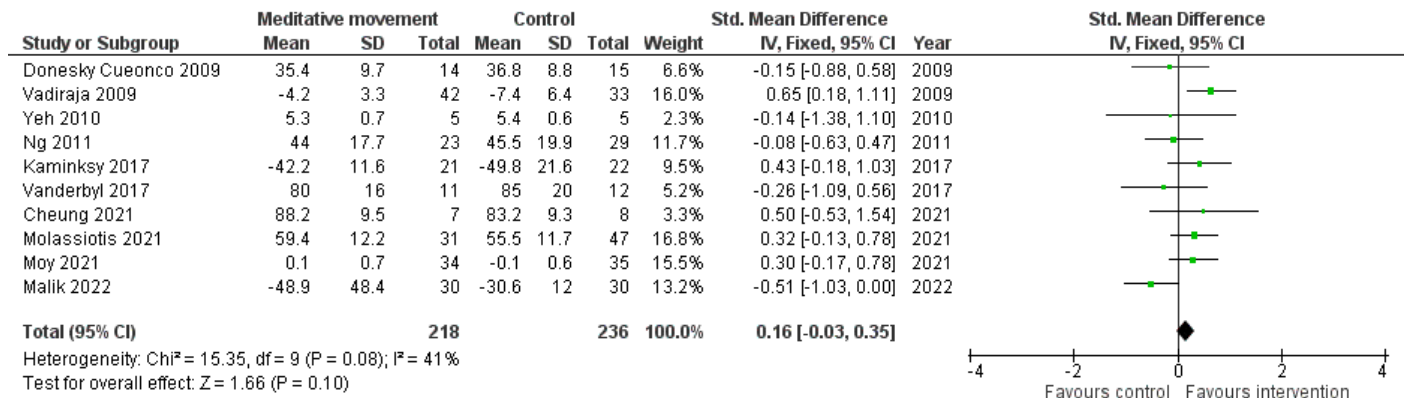

Figure S10. Forest plot comparing meditative movement and control intervention for health-related quality of life (excluding study with outlier data).

Abbreviations: CI: Confidence Interval; SD: Standard Deviation.

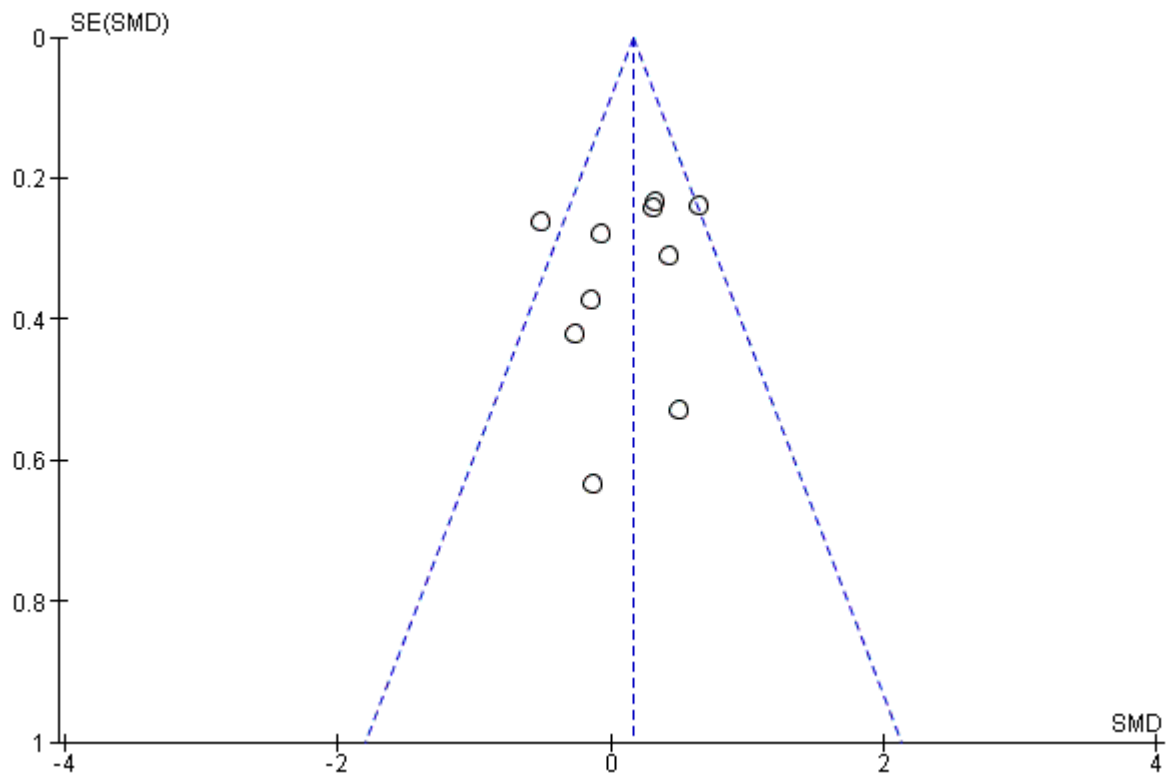

Figure S11. Funnel plot comparing meditative movement and control intervention for health-related quality of life (excluding study with outlier data).

*Abbreviations: SMD: Standardised Mean Difference.*

**Secondary outcome: Exercise capacity**

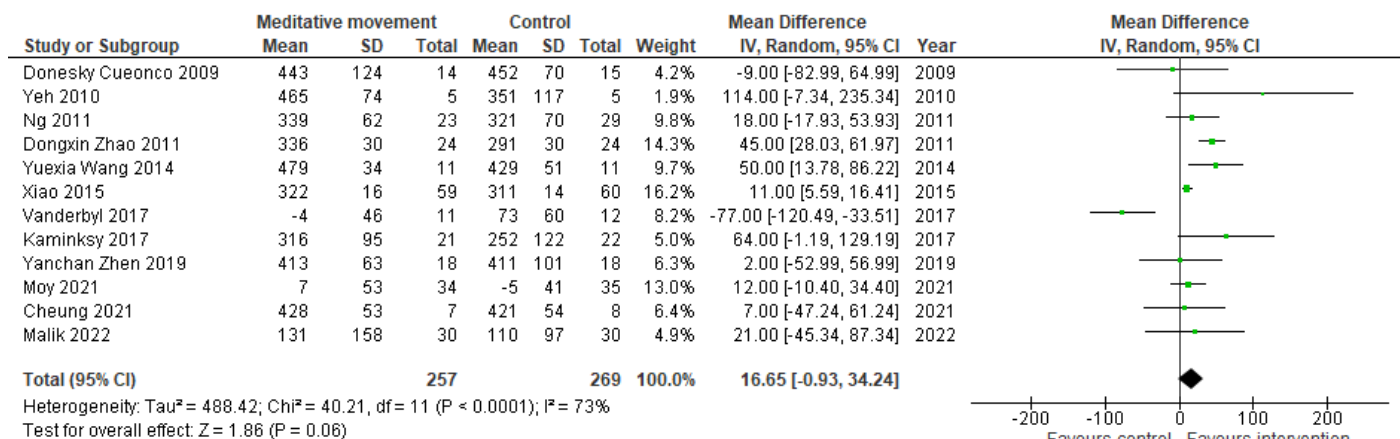

Figure S12. Forest plot comparing meditative movement and control intervention for exercise capacity including the study with outlier data (Xiao and colleagues) (1).

Abbreviations: CI: Confidence Interval; SD: Standard Deviation.

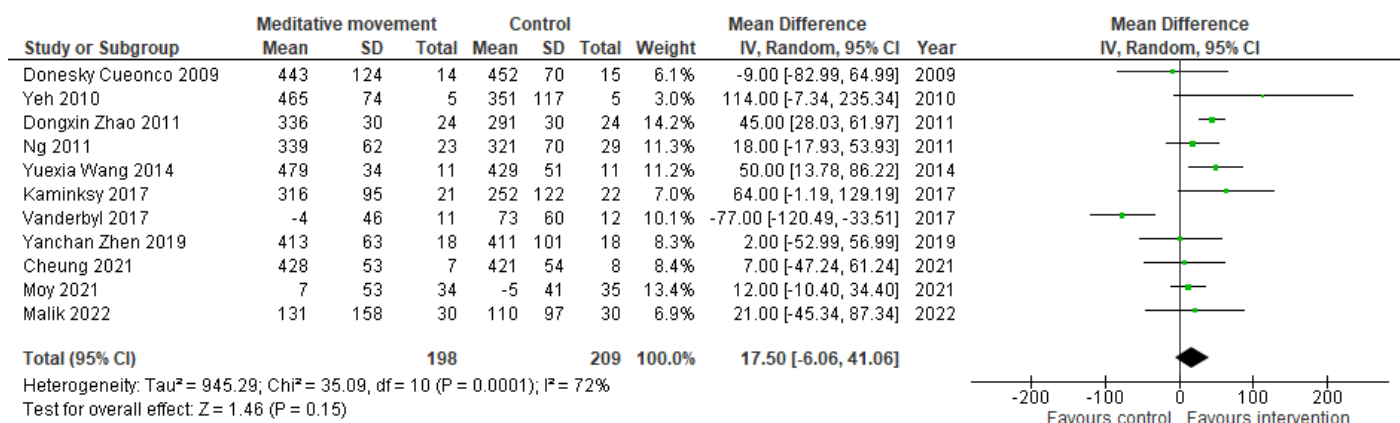

Figure S13. Forest plot comparing meditative movement and control intervention for exercise capacity (excluding study with outlier data).

Abbreviations: CI: Confidence Interval; SD: Standard Deviation.



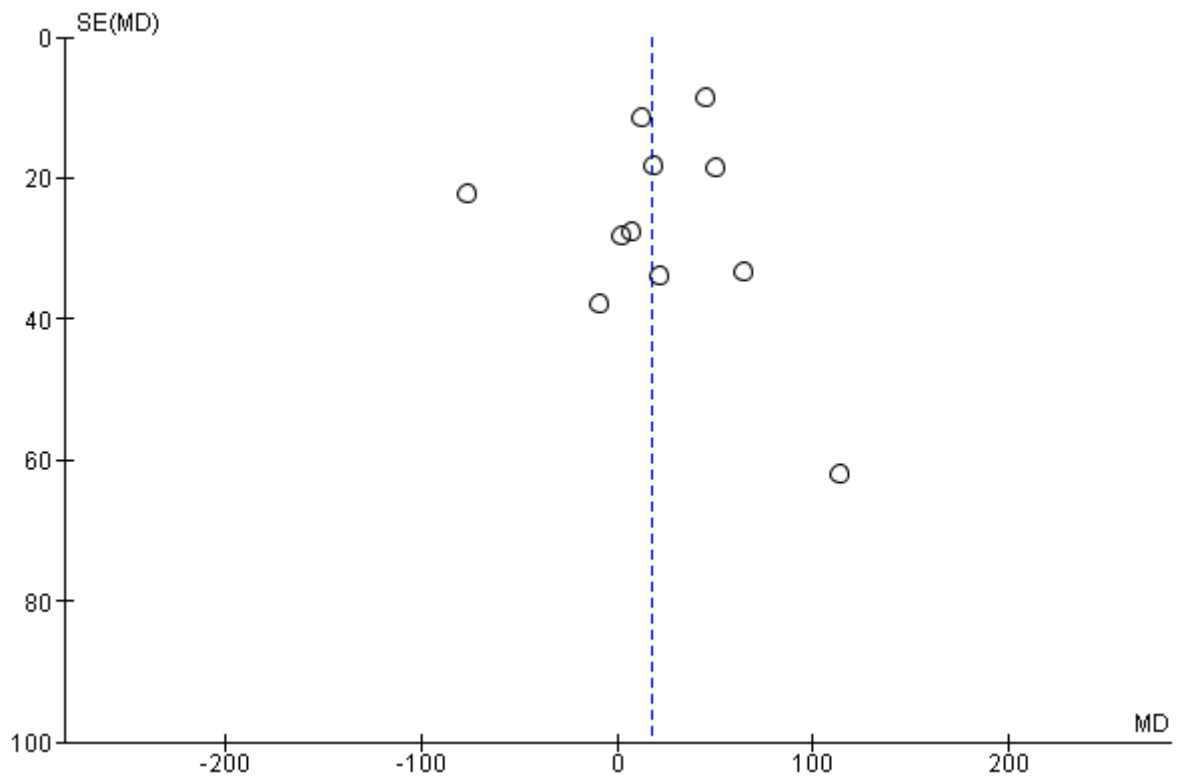

Figure S14. Funnel plot comparing meditative movement and control intervention for exercise capacity (excluding study with outlier data).

*Abbreviations: MD: Mean Difference*

**Table S1. Adverse and serious adverse events**

| Study information                   | Adverse events        |           |                                                                                                             |            |                                                                                                             | Serious adverse events |           |                                                                |            |                                                                            |            |
|-------------------------------------|-----------------------|-----------|-------------------------------------------------------------------------------------------------------------|------------|-------------------------------------------------------------------------------------------------------------|------------------------|-----------|----------------------------------------------------------------|------------|----------------------------------------------------------------------------|------------|
|                                     | Author, Study country | Total no. | No. in IG                                                                                                   | Type in IG | No. in CG                                                                                                   | Type in CG             | Total no. | No. in IG                                                      | Type in IG | No. in CG                                                                  | Type in CG |
| <b>Intervention: Tai Chi</b>        |                       |           |                                                                                                             |            |                                                                                                             |                        |           |                                                                |            |                                                                            |            |
| <b>Disease: COPD</b>                |                       |           |                                                                                                             |            |                                                                                                             |                        |           |                                                                |            |                                                                            |            |
| Yeh et al 2010, USA (2)             | 0                     | 0         | N/A                                                                                                         | 0          | N/A                                                                                                         | 0                      | 0         | N/A                                                            | 0          | N/A                                                                        |            |
| Yuxia Wang et al 2014, China (3)    | 2                     | 1         | Chest infection: 1                                                                                          | 1          | Chest infection: 1                                                                                          | 0                      | 0         | N/A                                                            | 0          | N/A                                                                        |            |
| Polkey et al 2018, China (4)        | 21                    | 15        | Chest infection: 15                                                                                         | 6          | Chest infection: 6                                                                                          | 13                     | 6         | Hospitalisation: 6 (renal: 2, stroke: 1, COPD exacerbation: 3) | 7          | Hospitalisation: 7 (COPD exacerbation:3, trauma: 1, cardiac: 1, oedema: 1) |            |
| Zhu et al 2018, China (5)           | NR                    | NR        | NR                                                                                                          | NR         | NR                                                                                                          | NR                     | NR        | NR                                                             | NR         | NR                                                                         |            |
| Moy et al 2021, USA (6)             | 45                    | 27        | Respiratory: 15 (remaining 12 events not described)                                                         | 18         | Respiratory: 10 (remaining 8 events not described)                                                          | NR                     | NR        | NR                                                             | NR         | NR                                                                         |            |
| <b>Disease: Cancer</b>              |                       |           |                                                                                                             |            |                                                                                                             |                        |           |                                                                |            |                                                                            |            |
| Cheung et al 2021, Hong Kong (7)    | 0                     | 0         | NA                                                                                                          | 0          | NA                                                                                                          | 5                      | 2         | Deceased                                                       | 3          | Deceased                                                                   |            |
| <b>Intervention: Yoga</b>           |                       |           |                                                                                                             |            |                                                                                                             |                        |           |                                                                |            |                                                                            |            |
| <b>Disease: COPD</b>                |                       |           |                                                                                                             |            |                                                                                                             |                        |           |                                                                |            |                                                                            |            |
| Donesky Cuenco et al 2009, USA (8)  | 10                    | ?         | COPD exacerbation: 5<br>Co-morbid illness: 5<br>Not related to intervention (group allocation not reported) | ?          | COPD exacerbation: 5<br>Co-morbid illness: 5<br>Not related to intervention (group allocation not reported) | 1                      | 0         | N/A                                                            | 1          | Deceased                                                                   |            |
| Kaminsky et al 2017, USA (9)        | 1                     | ?         | Anxiety and depression: 1 (group allocation not reported)                                                   | ?          | Anxiety and depression: 1 (group allocation not reported)                                                   | 1                      | ?         | Lung cancer: 1 (group allocation not reported)                 | ?          | Lung cancer: 1 (group allocation not reported)                             |            |
| Malik et al 2022, India (10)        | 0                     | 0         | N/A                                                                                                         | 0          | N/A                                                                                                         | 0                      | 0         | N/A                                                            | 0          | N/A                                                                        |            |
| <b>Disease: Cancer</b>              |                       |           |                                                                                                             |            |                                                                                                             |                        |           |                                                                |            |                                                                            |            |
| Vadiraja et al 2009, India (11)     | NR                    | NR        | NR                                                                                                          | NR         | NR                                                                                                          | NR                     | NR        | NR                                                             | NR         | NR                                                                         |            |
| <b>Intervention: Qi Gong</b>        |                       |           |                                                                                                             |            |                                                                                                             |                        |           |                                                                |            |                                                                            |            |
| <b>Disease: COPD</b>                |                       |           |                                                                                                             |            |                                                                                                             |                        |           |                                                                |            |                                                                            |            |
| Dongxin Zhao et al 2011, China (12) | NR                    | NR        | NR                                                                                                          | NR         | NR                                                                                                          | NR                     | NR        | NR                                                             | NR         | NR                                                                         |            |
| Ng et al 2011, Hong Kong (13)       | NR                    | NR        | NR                                                                                                          | NR         | NR                                                                                                          | 9                      | 6         | Hospitalised: 1<br>Deceased: 5                                 | 3          | Hospitalised: 1<br>Deceased: 2                                             |            |

|                                         |    |    |                                 |    |                |                                         |    |                                                    |    |                                                    |
|-----------------------------------------|----|----|---------------------------------|----|----------------|-----------------------------------------|----|----------------------------------------------------|----|----------------------------------------------------|
| Xiao et al 2015,<br>China (1)           | 1  | 0  | N/A                             | 1  | Poor health: 1 | 3                                       | 2  | Hospitalised: 1<br>Deceased: 1                     | 1  | Hospitalised: 1                                    |
| Siqin Ji et al 2019,<br>China (14)      | NR | NR | NR                              | NR | NR             | NR                                      | NR | NR                                                 | NR | NR                                                 |
| Yanchan Zhen et al 2019,<br>China (15)  | 1  | 1  | Chest tightness, breathlessness | 0  | N/A            | NR                                      | NR | NR                                                 | NR | NR                                                 |
| <b>Disease: Cancer</b>                  |    |    |                                 |    |                |                                         |    |                                                    |    |                                                    |
| Vanderbyl et al 2017,<br>Canada (16)    | NR | NR | NR                              | NR | NR             | 15<br>(in 2- month follow-up<br>period) | ?  | Deceased: 15<br>(group allocation<br>not reported) | ?  | Deceased: 15<br>(group allocation not<br>reported) |
| Molassiotis et al 2021,<br>Vietnam (17) | NR | NR | NR                              | NR | NR             | 5                                       | 3  | Deceased                                           | 2  | Deceased                                           |

*Abbreviations: CG: Control Group; COPD: Chronic Obstructive Pulmonary Disease; IG: Intervention Group; PR: Pulmonary Rehabilitation; NR: Not Reported.*



## References

- (1) Xiao C, Zhuang Y. Efficacy of Liuzijue Qigong in individuals with chronic obstructive pulmonary disease in remission. *J Am Geriatr Soc* 2015;63(7):1420-1425.
- (2) Yeh GY, Roberts DH, Wayne PM, Davis RB, Quilty MT, Phillips RS. Tai chi exercise for patients with chronic obstructive pulmonary disease: a pilot study. *Respir Care* 2010;55(11):1475-1482.
- (3) 王月霞, 莫家赐, 成东海, 刘豹, 忽新刚. 太极拳运动对慢性阻塞性肺疾病患者生存质量和 BODE 指数的影响. *中国康复医学杂志* 2014;29(8):745-747.
- (4) Polkey MI, Qiu Z, Zhou L, Zhu M, Wu Y, Chen Y, et al. Tai Chi and pulmonary rehabilitation compared for treatment-naive patients with COPD: a randomized controlled trial. *Chest* 2018;153(5):1116-1124.
- (5) Zhu S, Shi K, Yan J, He Z, Wang Y, Yi Q, et al. A modified 6-form Tai Chi for patients with COPD. *Complement Ther Med* 2018;39:36-42.
- (6) Moy ML, Wayne PM, Litrownik D, Beach D, Klings ES, Davis RB, et al. Long-term Exercise After Pulmonary Rehabilitation (LEAP): a pilot randomised controlled trial of Tai Chi in COPD. *ERJ Open Research* 2021;7(3).
- (7) Cheung DST, Takemura N, Lam TC, Ho JCM, Deng W, Smith R, et al. Feasibility of aerobic exercise and Tai-Chi interventions in advanced lung cancer patients: a randomized controlled trial. *Integrative cancer therapies* 2021;20:15347354211033352.
- (8) Donesky-Cuenco D, Nguyen HQ, Paul S, Carrieri-Kohlman V. Yoga therapy decreases dyspnea-related distress and improves functional performance in people with chronic obstructive pulmonary disease: a pilot study. 2010.
- (9) Kaminsky DA, Guntupalli KK, Lippmann J, Burns SM, Brock MA, Skelly J, et al. Effect of yoga breathing (pranayama) on exercise tolerance in patients with chronic obstructive pulmonary disease: a randomized, controlled trial. *The Journal of Alternative and Complementary Medicine* 2017;23(9):696-704.
- (10) Malik S, Dua R, Krishnan AS, Kumar S, Kumar S, Neyaz O, et al. Exercise Capacity in Patients With Chronic Obstructive Pulmonary Disease Treated With Tele-Yoga Versus Tele-Pulmonary Rehabilitation: A Pilot Validation Study. *Cureus* 2022;14(11).
- (11) Hosakote VS, Rao MR, Nagendra RH, Raghuram N, Mohan R, Nanjundiah V, et al. Effects of yoga on symptom management in breast cancer patients: a randomized controlled trial. *International journal of yoga* 2009;2(2):73.
- (12) 赵东兴, 张挪富. 六字诀呼吸操联合氧疗对 COPD 合并自发性气胸的康复疗效研究. *中国当代医药* 2011;18(12):156-157.
- (13) Ng BH, Tsang HW, Jones AY, So CT, Mok TY. Functional and psychosocial effects of health qigong in patients with COPD: a randomized controlled trial. *The Journal of alternative and complementary medicine* 2011;17(3):243-251.
- (14) 季思勤, 罗功汶, 施克俭, 杨佩兰, 王振伟. 六字诀干预慢性阻塞性肺疾病稳定期患者的临床研究. *收藏* 2019;4.
- (15) Zheng Yanchan. Clinical study of Respiratory Baduanjin in patients with Chronic Obstructive Pulmonary Disease. *Guangzhou University of Chinese Medicine*; 2019.
- (16) Vanderbyl BL, Mayer MJ, Nash C, Tran AT, Windholz T, Swanson T, et al. A comparison of the effects of medical Qigong and standard exercise therapy on symptoms and quality of life in patients with advanced cancer. *Supportive Care in Cancer* 2017;25(6):1749-1758.
- (17) Molassiotis A, Vu DV, Ching SSY. The effectiveness of qigong in managing a cluster of symptoms (breathlessness-fatigue-anxiety) in patients with lung cancer: A randomized controlled trial. *Integrative Cancer Therapies* 2021;20:15347354211008253.

(1) Xiao C, Zhuang Y. Efficacy of Liuzijue Qigong in individuals with chronic obstructive pulmonary disease in remission. *J Am Geriatr Soc* 2015;63(7):1420-1425.

(2) Yeh GY, Roberts DH, Wayne PM, Davis RB, Quilty MT, Phillips RS. Tai chi exercise for patients with chronic obstructive pulmonary disease: a pilot study. *Respir Care* 2010;55(11):1475-1482.

(3) 王月霞, 莫家赐, 成东海, 刘豹, 忽新刚. 太极拳运动对慢性阻塞性肺疾病患者生存质量和 BODE 指数的影响. *中国康复医学杂志* 2014;29(8):745-747.

(4) Polkey MI, Qiu Z, Zhou L, Zhu M, Wu Y, Chen Y, et al. Tai Chi and pulmonary rehabilitation compared for treatment-naive patients with COPD: a randomized controlled trial. *Chest* 2018;153(5):1116-1124.

- (5) Zhu S, Shi K, Yan J, He Z, Wang Y, Yi Q, et al. A modified 6-form Tai Chi for patients with COPD. *Complement Ther Med* 2018;39:36-42.
- (6) Moy ML, Wayne PM, Litrownik D, Beach D, Klings ES, Davis RB, et al. Long-term Exercise After Pulmonary Rehabilitation (LEAP): a pilot randomised controlled trial of Tai Chi in COPD. *ERJ Open Research* 2021;7(3).
- (7) Cheung DST, Takemura N, Lam TC, Ho JCM, Deng W, Smith R, et al. Feasibility of aerobic exercise and Tai-Chi interventions in advanced lung cancer patients: a randomized controlled trial. *Integrative cancer therapies* 2021;20:15347354211033352.
- (8) Donesky-Cuenco D, Nguyen HQ, Paul S, Carrieri-Kohlman V. Yoga therapy decreases dyspnea-related distress and improves functional performance in people with chronic obstructive pulmonary disease: a pilot study. 2010.
- (9) Kaminsky DA, Guntupalli KK, Lippmann J, Burns SM, Brock MA, Skelly J, et al. Effect of yoga breathing (pranayama) on exercise tolerance in patients with chronic obstructive pulmonary disease: a randomized, controlled trial. *The Journal of Alternative and Complementary Medicine* 2017;23(9):696-704.
- (10) Malik S, Dua R, Krishnan AS, Kumar S, Kumar S, Neyaz O, et al. Exercise Capacity in Patients With Chronic Obstructive Pulmonary Disease Treated With Tele-Yoga Versus Tele-Pulmonary Rehabilitation: A Pilot Validation Study. *Cureus* 2022;14(11).
- (11) Hosakote VS, Rao MR, Nagendra RH, Raghuram N, Mohan R, Nanjundiah V, et al. Effects of yoga on symptom management in breast cancer patients: a randomized controlled trial. *International journal of yoga* 2009;2(2):73.
- (12) 赵东兴, 张挪富. 六字诀呼吸操联合氧疗对 COPD 合并自发性气胸的康复疗效研究. *中国当代医药* 2011;18(12):156-157.
- (13) Ng BH, Tsang HW, Jones AY, So CT, Mok TY. Functional and psychosocial effects of health qigong in patients with COPD: a randomized controlled trial. *The Journal of alternative and complementary medicine* 2011;17(3):243-251.
- (14) 季思勤, 罗功汶, 施克俭, 杨佩兰, 王振伟. 六字诀干预慢性阻塞性肺疾病稳定期患者的临床研究. *收藏* 2019;4.
- (15) Zheng Yanchan. Clinical study of Respiratory Baduanjin in patients with Chronic Obstructive Pulmonary Disease. *Guangzhou University of Chinese Medicine*; 2019.
- (16) Vanderbyl BL, Mayer MJ, Nash C, Tran AT, Windholz T, Swanson T, et al. A comparison of the effects of medical Qigong and standard exercise therapy on symptoms and quality of life in patients with advanced cancer. *Supportive Care in Cancer* 2017;25(6):1749-1758.
- (17) Molassiotis A, Vu DV, Ching SSY. The effectiveness of qigong in managing a cluster of symptoms (breathlessness-fatigue-anxiety) in patients with lung cancer: A randomized controlled trial. *Integrative Cancer Therapies* 2021;20:15347354211008253.
